# Supplementary material for: Analysis of Cancer Knowledge, Attitudes, and Practices in Adolescents and Young Adults in Two Texas Rural Communities
Source: PubMed Central journal article supplement — Inquiry. 2022 May 3;59:00469580221098754. doi: 10.1177/00469580221098754 (PMC9069598; doi:10.1177/00469580221098754), 2022-05-03
Supplement: sj-pdf-1-inq-10.1177_00469580221098754.pdf [file sj-pdf-1-inq-10.1177_00469580221098754.pdf]

# 1. GENERAL AND SOCIODEMOGRAPHIC INFORMATION

| Adults (>18 years)                |                                                                                                                                                                    |                                                                                                                                                                                                                                                                                                                                                                                                                                            |
|-----------------------------------|--------------------------------------------------------------------------------------------------------------------------------------------------------------------|--------------------------------------------------------------------------------------------------------------------------------------------------------------------------------------------------------------------------------------------------------------------------------------------------------------------------------------------------------------------------------------------------------------------------------------------|
| 1.2. Sex                          | <i>Insert the sex of the respondent</i>                                                                                                                            | Male <input type="checkbox"/><br>Female <input type="checkbox"/><br>Other (Please specify)<br>_____                                                                                                                                                                                                                                                                                                                                        |
| 1.3. Age                          | On what day and in which month and year where you born?                                                                                                            | __ / __ / ____<br>day month year                                                                                                                                                                                                                                                                                                                                                                                                           |
| 1.4. Geographical characteristics | Where do you live? Please list the name of the city, town or colonia<br><i>Adapt to the local geographical characteristics: city, town, colonia, section, etc.</i> | <input type="checkbox"/> Colonia<br>_____<br><input type="checkbox"/> Sub-division<br>_____<br><input type="checkbox"/> I don't know<br>_____                                                                                                                                                                                                                                                                                              |
| 1.5. Educational level            | What is the highest level of school you attended?                                                                                                                  | <input type="checkbox"/> Less than a high school diploma<br><input type="checkbox"/> High school equivalency or GED<br><input type="checkbox"/> High school graduate<br><input type="checkbox"/> Technical School certification<br><input type="checkbox"/> College/University (Associates, Bachelors)<br><input type="checkbox"/> Graduate school or terminal degree (Masters, Doctorate)<br><input type="checkbox"/> Not applicable/none |
| 1.6 Family Income                 | What is your annual family income?                                                                                                                                 | <input type="checkbox"/> 0 to 29,999<br><input type="checkbox"/> 30,000 to 49,999<br><input type="checkbox"/> 50,000 to 99,000<br><input type="checkbox"/> 100,000 to 349,000<br><input type="checkbox"/> 350,000 to more                                                                                                                                                                                                                  |

1.7. Ethnic origin (mark all that apply)

- Indian/Alaskan
- Asian
- African American
- Hispanic/Latino (a)
- White
- Hawaiian/Pacific Islander
- Other \_\_\_\_\_

1.8. Marital Status

- Single
- Separated
- Married
- Common law
- Divorced
- Widowed
- Prefer not to answer

- 1.9. Are you currently working?  Yes  No
- 1.9.1. If **No**, go to question 2.1
- 1.9.2. If **Yes**, what is your occupation? \_\_\_\_\_

## 2. KNOWLEDGE OF CANCER AND RISK

- 2.1. Describe what cancer is \_\_\_\_\_
- 2.2. Have you heard about cancer warnings signals?  Yes  No
- 2.2.1 If **No**, go to question 2.3
- 2.2.2 If **Yes**, can you list three of the warning signals? \_\_\_\_\_
- 2.3. Can you list some of the factors that may lead a person to develop cancer? \_\_\_\_\_

2.4. Where did you receive cancer prevention information? (Please mark all that apply)

- Internet/Social media
- Media (television, radio)
- Friends/peers
- Relatives
- Newspaper
- Healthcare worker or professionals
- Other
- Never received cancer information

2.5. There are various types of cancers in adolescents and young adults. Can you list three of the cancers that are most frequently found in these age groups?  Yes  No

2.5.1. If **No**, go to question 2.7

2.5.2. If **Yes**, name three types of cancer for adolescents and youth (18 – 25 years old)

2.5.3. If **Yes**, name three for young adults (26 -39 years old) \_\_\_\_\_

2.6. Can you mention three places that offer health screening for adolescents, youth and young adults?

Yes  No

2.6.1. If **No**, go to question 2.7.

2.6.2. If **Yes**, please name the options: \_\_\_\_\_

2.7 Can you mention three places that offer cancer screenings for adolescents, youth and young adults?

Yes       No

2.7.1. If **No**, go to question 2.8.

2.7.2. If **Yes**, please name the options. \_\_\_\_\_

2.8 Do you know that breast cancer is a preventable chronic disease?

2.8.1. If **No**, go to question 2.9.

2.8.2. If **Yes**, please describe how it can be prevented: \_\_\_\_\_

2.8.3. Do you practice any of these examples?     Yes       No

2.9 Do you know that cervical cancer is a preventable chronic disease?

2.9.1. If **No**, go to question 2.10.

2.9.2. If **Yes**, please tell us how it can be prevented: \_\_\_\_\_

2.9.3. Do you practice any of these examples?     Yes       No

2.10. Do you know that lung cancer is a preventable chronic disease?

2.10.1. If **No**, go to question 3

2.10.2. If **Yes**, please tell us how it can be prevented: \_\_\_\_\_

2.10.3. Do you practice any of these examples?     Yes       No

### 3. ATTITUDES ABOUT CANCER SCREENINGS

3.1. When you hear the word cancer, what comes to your mind? Please describe \_\_\_\_\_

3.2. Do you know somebody with cancer?     Yes       No       don't know

3.3. Does cancer risk run in your family?     Yes       No       don't know

3.3.1. If **No**, go to question 3.4.

3.3.2. If **Yes**, please describe which of them \_\_\_\_\_

3.4. Do you think it is possible for you to develop any type of cancer?

Yes       No       don't know

3.4.1. If **No** go to question 3.5.

3.4.2. If **Yes**, please describe why \_\_\_\_\_

3.5. Have you ever ask your doctor to perform a screening, in order to know your status and ways to prevent any type of cancer?     Yes       No

3.5.1. If **No**, go to question 3.6.

3.5.2. If **Yes**, please describe why \_\_\_\_\_

3.6. Which type of screenings do you know to prevent cancer in adolescents, youth and young adults? \_\_\_\_\_

### 4. PRACTICES AND HEALTH SEEKING BEHAVIORS

4.1. Do you practice any healthy behavior in order to prevent cancer?

Yes       No

4.1.1. If **No**, go to question 4.2.

4.1.2. If **Yes**, please tell us which are your health seeking behaviors in order to prevent cancer? \_\_\_\_\_

4.1.3. What lead you to practice these behaviors? \_\_\_\_\_

4.2. Have you ever participated in an early cancer prevention program?  Yes  No

4.2.1. If **No**, go to question 4.3.

4.2.2. If **Yes**, please tell which one (s)? \_\_\_\_\_

4.3. What actions can you take to make it less likely that you will develop cancer in the future? Please describe. \_\_\_\_\_

4.4. Has a Doctor or other professional ever talked with you about preventing cancer?  Yes

4.4.1. If **No**, go to question 4.5

4.4.2. If **Yes**, please mark if it was

Within the past month

Within the past 6 months

Within the past 12 months

Within the past 3 years

4.5. Has a doctor or other health professional ever talked with you about physical activity?

Yes  No

4.6. Has a doctor or other health professional ever talked with you about drinking alcohol or using drugs?  Yes  No

4.7. Has a doctor or other health professional ever talked with you about smoking?

Yes  No

4.8. Which of the following best describes you at presently?

I'm actively doing things to prevent cancer

I'm not doing anything to prevent cancer

4.9. From 0 (lowest) to 10 (highest) how do you grade your health status? \_\_\_\_\_

4.10. Please describe \_\_\_\_\_

4.11. Would you use digital and social media to learn about cancer?  Yes  No

## 5. PREVENTION ACTIONS

5.1. Do you think it is important to develop programs for adolescents and young adults that improve cancer education and prevention?  Yes  No

5.1.1. If **No** go to question 5.2.

5.1.2. If **Yes**, please tell us which kind of information would be the most helpful? \_\_\_\_\_

5.2. If you learned about cancer prevention would you teach to others? \_\_\_\_\_

5.3. Would you do any volunteer service or raise funds to support someone with cancer?  
\_\_\_\_ Yes \_\_\_\_ No

**6. CANCER AND COVID-19**

6.1 Do you think that with the COVID-19 pandemic, doctors are screening or testing for cancer?

Yes  No

6.1.1. If you answer **Yes**, go to question 6.2

6.1.2. If your answer is **No**, please describe why? \_\_\_\_\_

6.2 Since COVID-19 do you think that health care professionals (i.e., doctors, nurses and other health care workers) are educating on cancer  Yes  No

6.2.1 If your answer is **Yes**, go to question 6.3

6.2.2. If your answer is **No**, please describe why? \_\_\_\_\_

6.3 Do you think that with COVID-19 doctors continue providing cancer care?

Yes  No

6.3.1. If your answer is **No**, why do you think this is so? \_\_\_\_\_

7. Anything else that you would like to share. \_\_\_\_\_

Thank you for your participation!

## 1. INFORMACIÓN GENERAL Y SOCIODEMOGRÁFICA

| Adultos (> 18 años)               |                                                                                                                                                                      |                                                                                                                                                                                                                                                                                                                                                                                                                                                                          |
|-----------------------------------|----------------------------------------------------------------------------------------------------------------------------------------------------------------------|--------------------------------------------------------------------------------------------------------------------------------------------------------------------------------------------------------------------------------------------------------------------------------------------------------------------------------------------------------------------------------------------------------------------------------------------------------------------------|
| 1. 2. Sexo                        | <i>Insertar el sexo del encuestado</i>                                                                                                                               | Hombre <input type="checkbox"/><br>Mujer <input type="checkbox"/><br>Otros (especificar) _____                                                                                                                                                                                                                                                                                                                                                                           |
| 1. 3. Edad                        | ¿En qué día y en qué mes y año nació?                                                                                                                                | __ / __ / ____<br>día mes año                                                                                                                                                                                                                                                                                                                                                                                                                                            |
| 1. 4. Características geográficas | ¿Dónde vive? Indique el nombre de la ciudad, pueblo o colonia.<br><i>Adaptarse a las características geográficas locales: ciudad, pueblo, colonia, sección, etc.</i> | <input type="checkbox"/> Colonia<br>_____<br><input type="checkbox"/> Sub-Division<br>_____<br><input type="checkbox"/> No se                                                                                                                                                                                                                                                                                                                                            |
| 1. 5. Nivel educativo             | ¿Cuál es el nivel más alto de la escuela a la que asististe?                                                                                                         | <input type="checkbox"/> Menos que un diploma de secundaria<br><input type="checkbox"/> Equivalencia de escuela secundaria o GED<br><input type="checkbox"/> Graduado de preparatoria<br><input type="checkbox"/> Certificación de escuela técnica<br><input type="checkbox"/> Colegio / Universidad (Asociados, Licenciados)<br><input type="checkbox"/> Escuela de posgrado o título terminal (maestría, doctorado)<br><input type="checkbox"/> No aplicable / ninguno |
| 1. 6. Ingresos familiares         | ¿Cuál es su ingreso familiar anual?                                                                                                                                  | <input type="checkbox"/> 0 a 29,999<br><input type="checkbox"/> 30,000 a 49,999<br><input type="checkbox"/> 50,000 a 99,000<br><input type="checkbox"/> 100,000 a 349,000<br><input type="checkbox"/> 350,000 a más                                                                                                                                                                                                                                                      |

### 1. 7. Origen étnico (seleccione todos los que correspondan)

- Indio(a) / de Alaska
- Asiático(a)
- Afro-Americano (a)
- Hispano / Latino (a)
- Blanco
- Isleño Hawaiano / Pacífico
- Otro \_\_\_\_\_

1. 8. Estado Civil

- Soltero(a)
- Separado(a)
- Casado(a)
- Ley común /unión libre
- Divorciado
- Viudo
- Prefiere no responder

1. 9. ¿Está trabajando actualmente?  Sí  No

1.9.1. Si **No**, pase a la pregunta 2.1

1.9.2. Si, **Si**, ¿cuál es su ocupación? \_\_\_\_\_

**2. CONOCIMIENTO DE CÁNCER Y RIESGO**

2.1. Escriba que entiende usted por cáncer. \_\_\_\_\_

2.2. ¿Ha oído hablar de las señales de advertencia de cáncer?  Sí  No

2.2.1 Si **no**, pase a la pregunta 2.3

2.2.2 En caso afirmativo, ¿Escriba tres de las señales de advertencia? \_\_\_\_\_

2.3. Escriba algunos de los factores que pueden llevar a una persona a desarrollar cáncer \_

2.4. ¿Cómo recibió información sobre la prevención del cáncer? (Por favor marque todo lo que corresponda)

- Internet / redes sociales
- Medios de comunicación (televisión, radio)
- Amigos / compañeros
- Parientes
- Periódico
- Trabajadores de la salud o profesionales
- Otro
- Nunca he recibido información sobre el cáncer

2.5. Existen varios tipos de cáncer en adolescentes y adultos jóvenes. ¿Puede escribir tres de los cánceres más frecuentes en estos grupos de edad?  Sí  No

2.5.1. Si **no**, pase a la pregunta 2.7

2.5.2. En caso **afirmativo**, escriba tres tipos para un grupo de adolescentes y jóvenes entre los 18 a 25 años. \_\_\_\_\_

2.5.3. En caso **afirmativo**, escriba tres para adultos jóvenes (26-39 años). \_\_\_\_\_

2.6. ¿Puede recordar tres lugares que ofrecen exámenes de salud para adolescentes y jóvenes adultos?

- Sí  No

2.6.1. En caso **negativo**, pase a la pregunta 2.7.

2.6.2. En caso **afirmativo**, escriba las opciones: \_\_\_\_\_

2.7. ¿Puede recordar tres lugares que ofrecen exámenes de detección de cáncer para adolescentes y jóvenes adultos?  Sí  No

2.7.1. En caso **negativo**, pase a la pregunta 2.8.

2.7.2. En caso **afirmativo**, escriba las opciones: \_\_\_\_\_

2.8. ¿Sabe que el cáncer de mama es una enfermedad crónica prevenible?  Sí  No

2.8.1. En caso **negativo**, pase a la pregunta 2.9.

2.8.2. En caso **afirmativo**, escriba cómo se puede prevenir. \_\_\_\_\_

2.8.3. ¿Practica alguna forma de prevención?  Sí  No

2.9. ¿Sabe que el cáncer cervical es una enfermedad crónica prevenible?  Sí  No

2.9.1. En caso **negativo**, pase a la pregunta 2.10.

2.9.2. En caso **afirmativo**, escriba como se puede prevenir. \_\_\_\_\_

2.9.3. ¿Practica alguno?  Sí  No

2.10. ¿Sabe que el cáncer de pulmón es una enfermedad crónica prevenible?  Sí  No

2.10.1. En caso **negativo**, pase a la pregunta 3

2.10.2. En caso **afirmativo**, escriba cómo se puede prevenir. \_\_\_\_\_

2.10.3. ¿Practica alguno?  Sí  No

### 3. ACTITUDES SOBRE LOS EXÁMENES DE CÁNCER

3.1. Cuando escucha la palabra cáncer, ¿qué te viene a la mente? escríbalo por favor  
\_\_\_\_\_

3.2. ¿Conoce a alguien con cáncer?  Sí  No  No se

3.3. ¿El riesgo de cáncer corre en su familia?  Sí  No  No se

3.3.1. En caso **negativo**, pase a la pregunta 3.4.

3.3.2. En caso **afirmativo**, escriba cuál de ellos. \_\_\_\_\_

3.4. ¿Cree que es posible que desarrolle algún tipo de cáncer?

Sí  No  No se

3.4.1. En caso **negativo**, pase a la pregunta 3.5.

3.4.2. En caso **afirmativo**, escriba por qué \_\_\_\_\_

3.5. ¿Alguna vez le ha pedido a su médico(a) que se realice un examen de detección para conocer su estado de salud para prevenir el cáncer?  Sí  No  No se

3.5.1. En caso **negativo**, pase a la pregunta 3.6.

3.5.2. En caso **afirmativo**, escriba por qué \_\_\_\_\_

3.6. ¿Qué tipo de exámenes conoce para prevenir el cáncer en la población adolescente, jóvenes y jóvenes adultos? \_\_\_\_\_

### 4. PRÁCTICAS Y COMPORTAMIENTOS DE BÚSQUEDA EN SALUD

4.1. ¿Practica algún comportamiento saludable para prevenir el cáncer?



Sí       No

4.1.1. En caso **negativo**, pase a la pregunta 4.2.

4.1.2. En caso **afirmativo**, escriba cuáles son sus comportamientos de búsqueda de salud para prevenir el cáncer. \_\_\_\_\_

4.1.3. ¿Qué le llevó a tomar estos comportamientos? \_\_\_\_\_

4. 2. ¿Alguna vez ha participado en un programa de prevención temprana del cáncer?

Sí       No

4.2.1 En caso **negativo**, pase a la pregunta 4.3.

4.2.2 ¿En caso afirmativo, escriba cuál (es)? \_\_\_\_\_

4.3. ¿Qué medidas puede tomar para que sea menos probable que desarrolle cáncer en el futuro? \_\_\_\_\_

4.4. ¿Alguna vez un médico(a) u otro profesional ha hablado con usted sobre la prevención del cáncer?       Sí       No

4.4.1. Si **No**, pase a la pregunta 4.5

4.4.2. En caso **afirmativo**, por favor seleccione:

- Dentro del mes pasado
- En los últimos 6 meses
- En los últimos 12 meses
- En los últimos 3 años

4.5. ¿Alguna vez un médico(a) u otro profesional de salud hablaron con usted sobre la actividad física?  Sí       No

4.6. ¿Alguna vez un médico(a) u otro profesional de la salud hablaron con usted acerca de beber alcohol o usar drogas?  Sí       No

4.7. ¿Alguna vez un médico(a) u otro profesional de la salud hablaron con usted sobre fumar?  Sí       No

4.8. ¿Cuál de las siguientes opciones le describe mejor en este momento?

- Estoy haciendo cosas activamente para prevenir el cáncer.
- No estoy tomando acciones en particular para prevenir el cáncer.

4. 9. De 0 (el más bajo) a 10 (lo más alto), ¿cómo califica su estado de salud? \_\_\_\_\_

4.10. Escriba por qué \_\_\_\_\_

4.11. ¿Usaría las redes sociales y digitales para aprender sobre el cáncer?

Sí       No

## 5. ACCIONES DE PREVENCION

5.1. ¿Cree que es importante desarrollar programas que mejoren la educación sobre la prevención del cáncer en adolescentes y jóvenes adultos?  Sí  No

5.1.1 En caso **negativo**, pase a la pregunta 5.2.

5.1.2. En caso **afirmativo**, escriba qué tipo de información. \_\_\_\_\_

5.2. Si aprende acerca de la prevención del cáncer en adolescentes y jóvenes adultos, ¿Le enseñaría a otros?  Sí  No

5.3. ¿Haría algún servicio voluntario o recaudaría fondos para apoyar a alguien con cáncer?  Sí  No

## 6. CANCER Y COVID-19

6.1 Considera que con la pandemia del COVID-19 los(as) médicos (as) siguen detectando o haciendo exámenes de cáncer  Sí  No

6.1.1. En caso positivo pase a la pregunta 6.2

6.1.2. En caso negativo escriba por qué. \_\_\_\_\_

6.2 Desde la pandemia COVID-19 considera que los encargados de salud (médicos, enfermeros y otros profesionistas en salud) siguen educando en cáncer?

Sí  No

6.2.1 En caso afirmativo, pase a la pregunta 6.3

6.2.2. En caso negativo, escriba por qué. \_\_\_\_\_

6.3. ¿Considera que con la pandemia los médicos siguen dando los tratamientos para el cáncer?  Sí  No

6.3.1. En caso negativo escriba que le hace pensar así. \_\_\_\_\_

7. Algo más que quiera compartir. \_\_\_\_\_

Gracias por su participación!
